# Supplementary material for: UM171 cooperates with PIM1 inhibitors to restrict HSC expansion markers and suppress leukemia progression
Source: PubMed Central journal article supplement (PMC9637110; doi:10.1038/s41420-022-01244-6), 2022-11-05

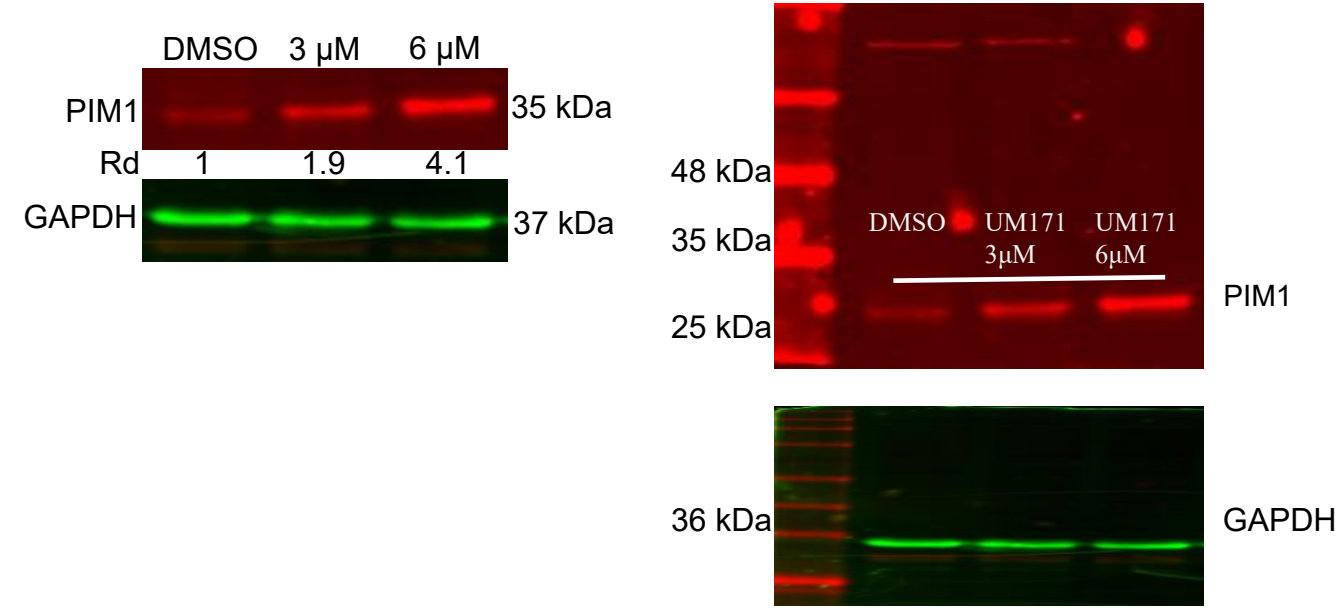

PIM1-pull down

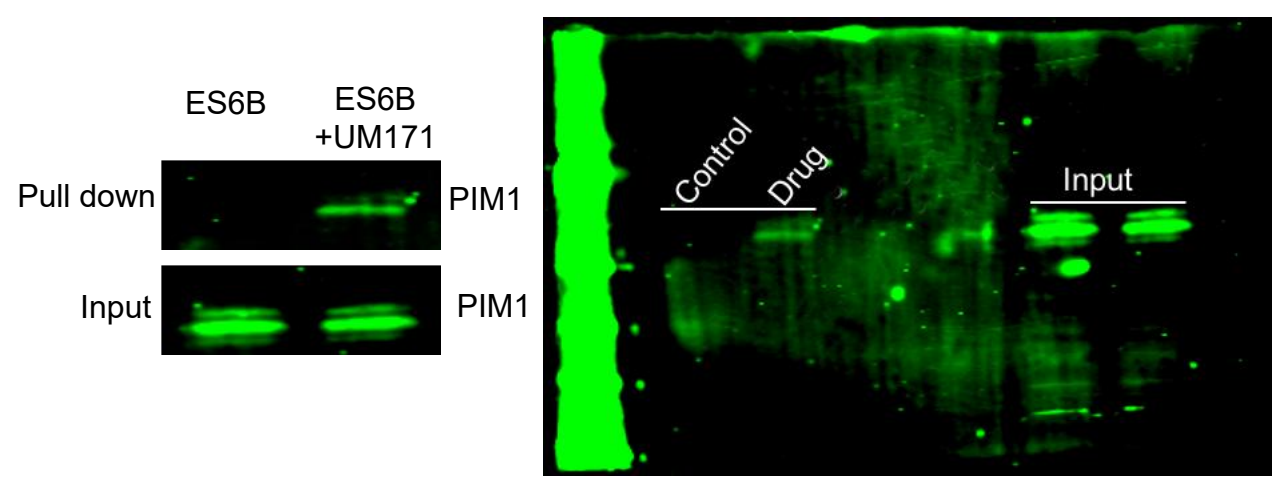

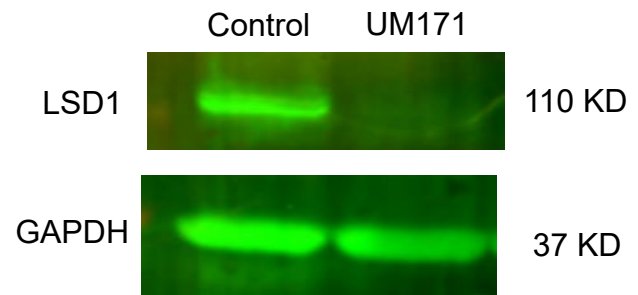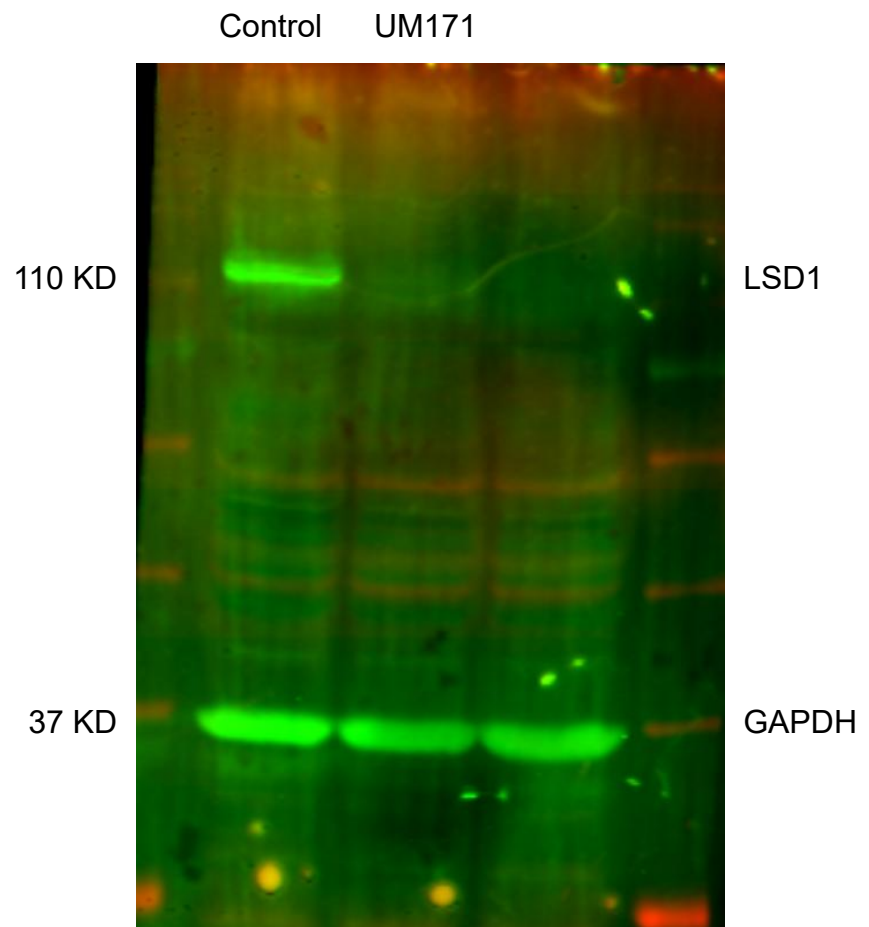

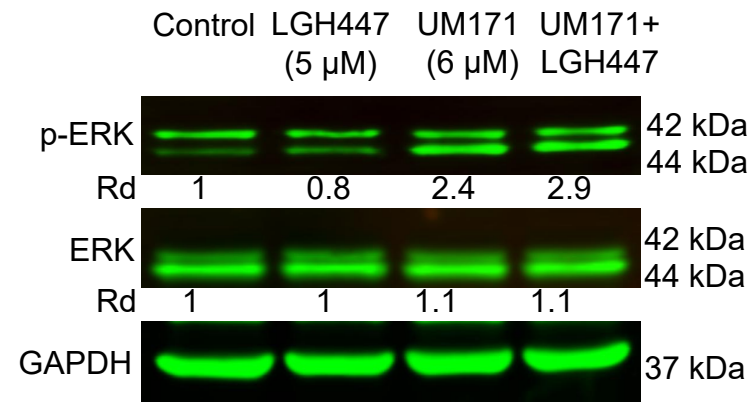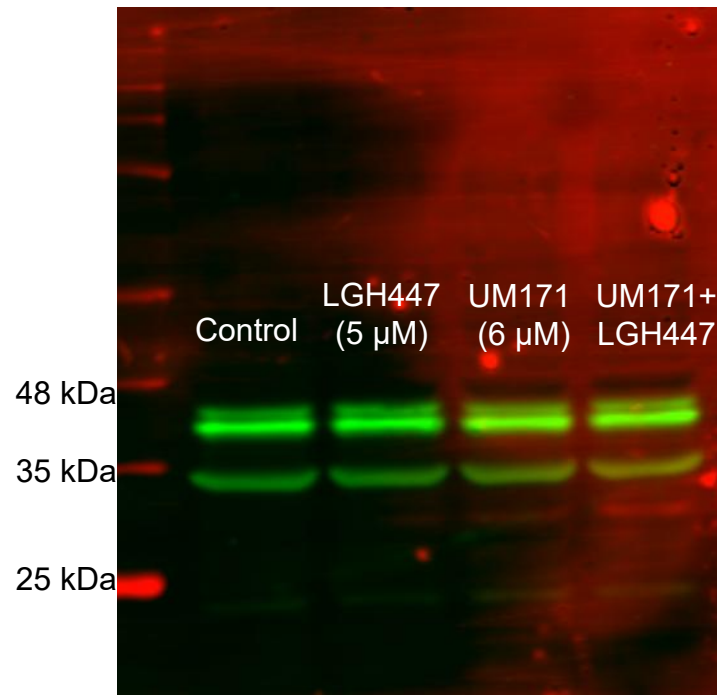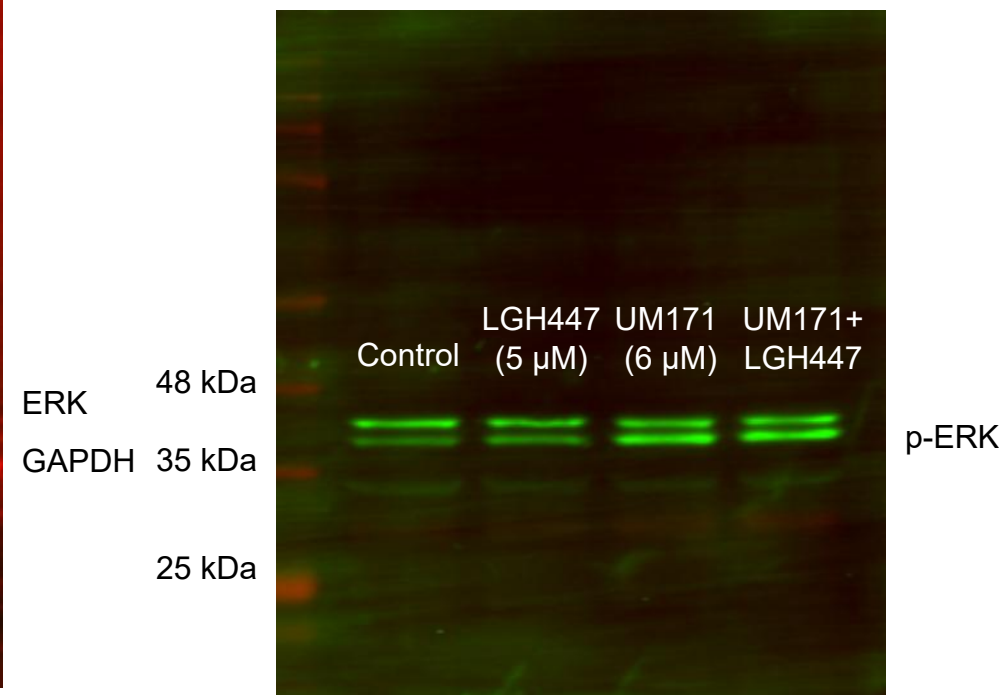

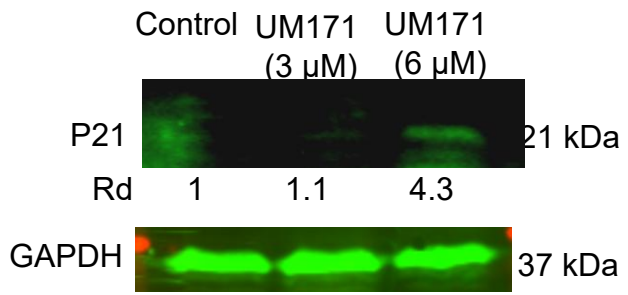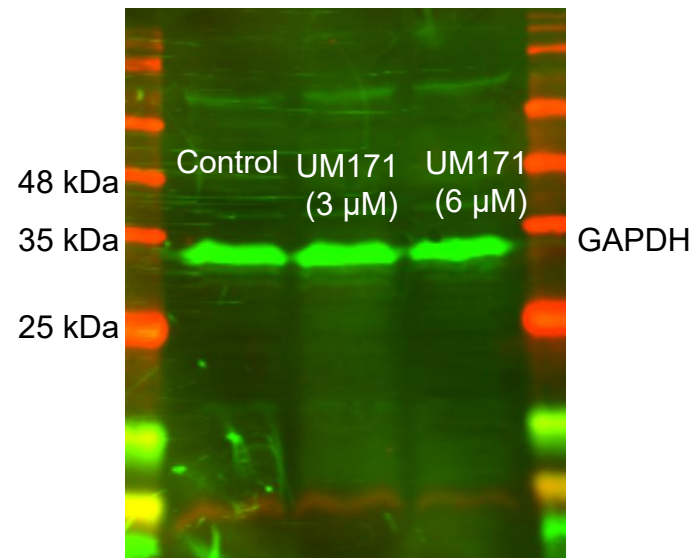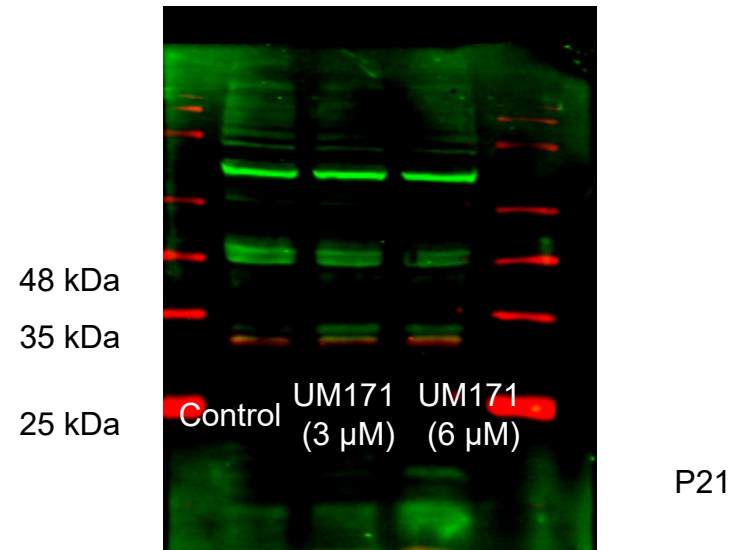

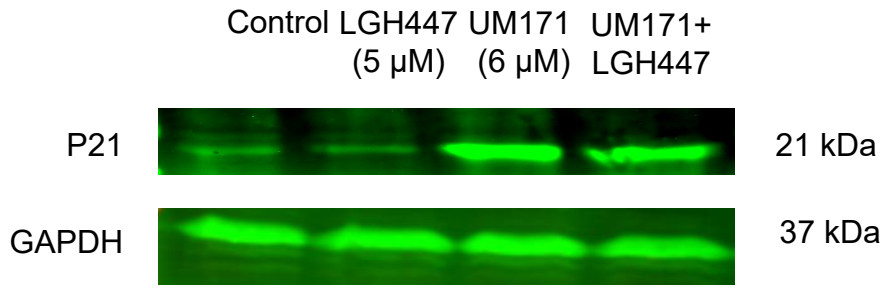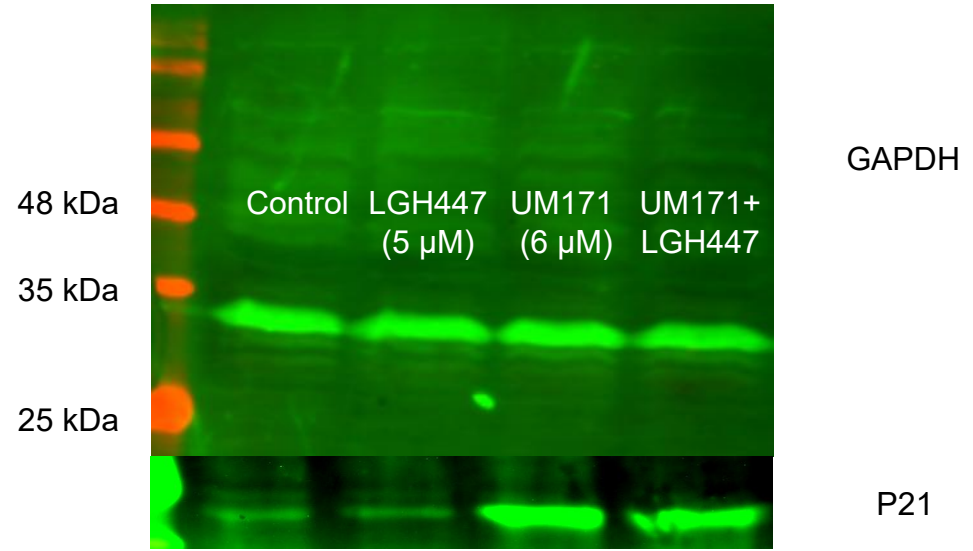

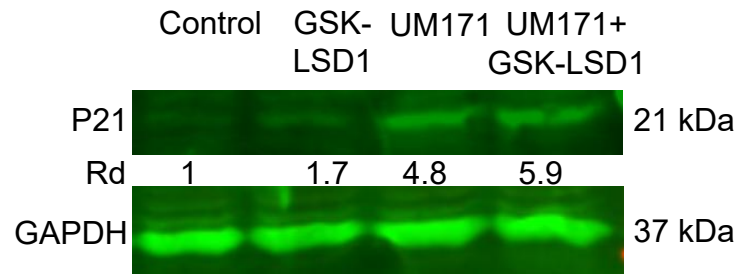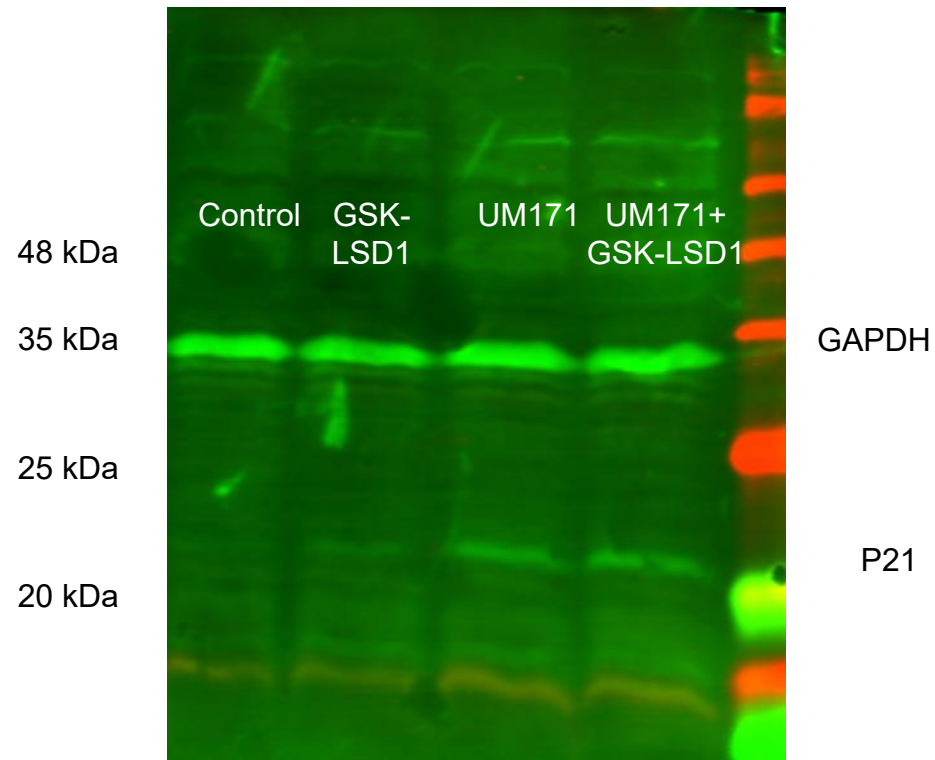

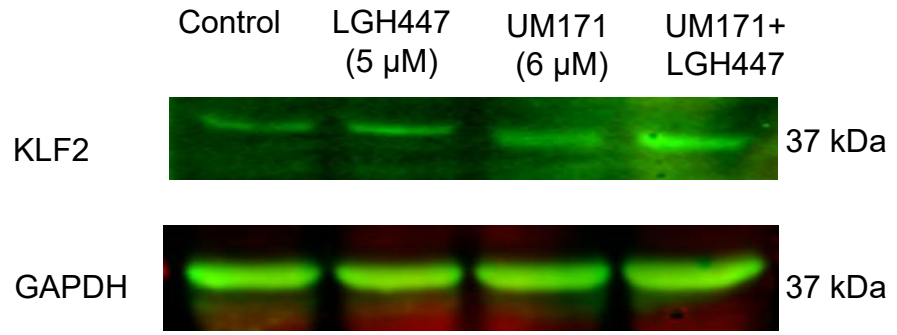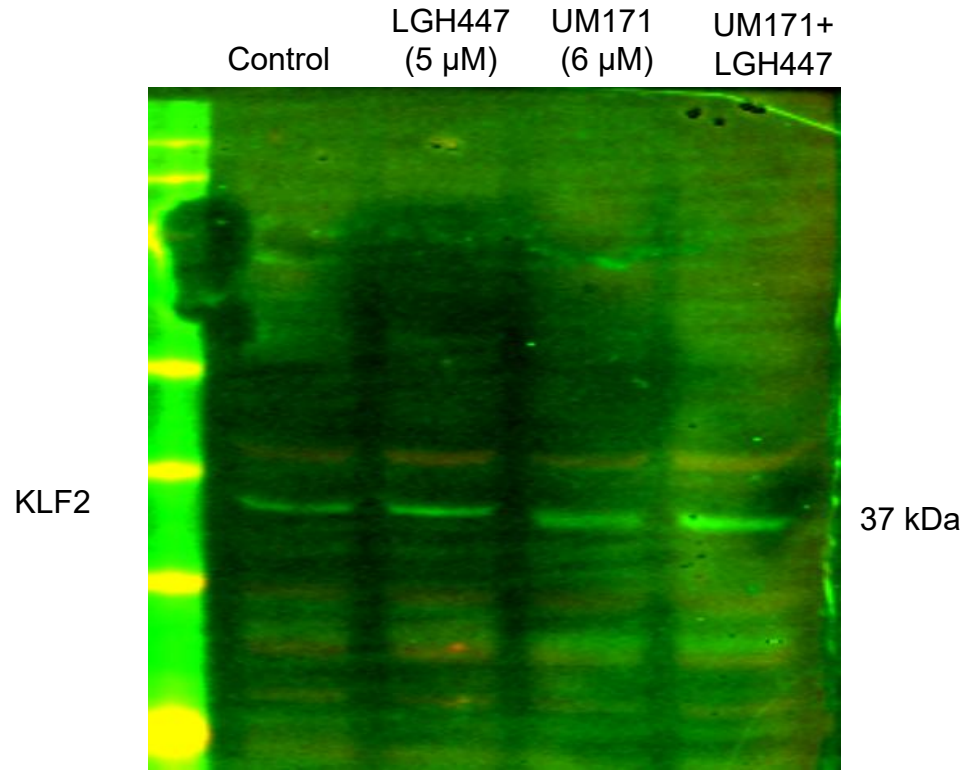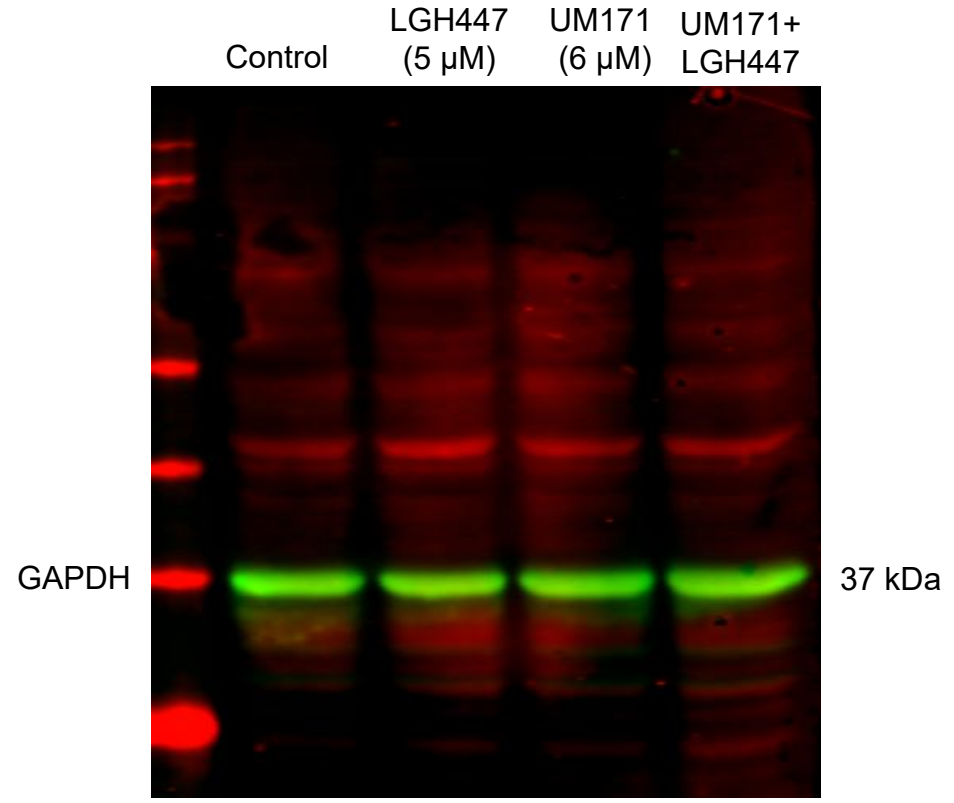

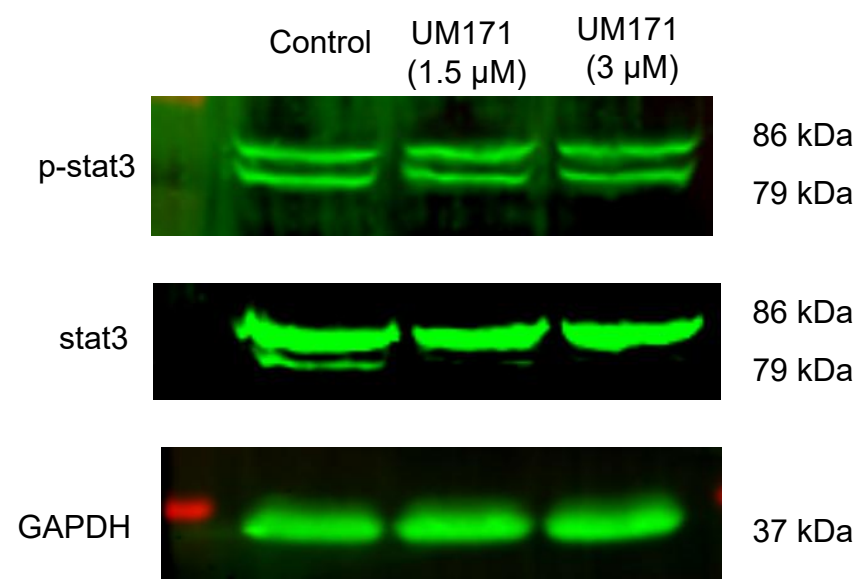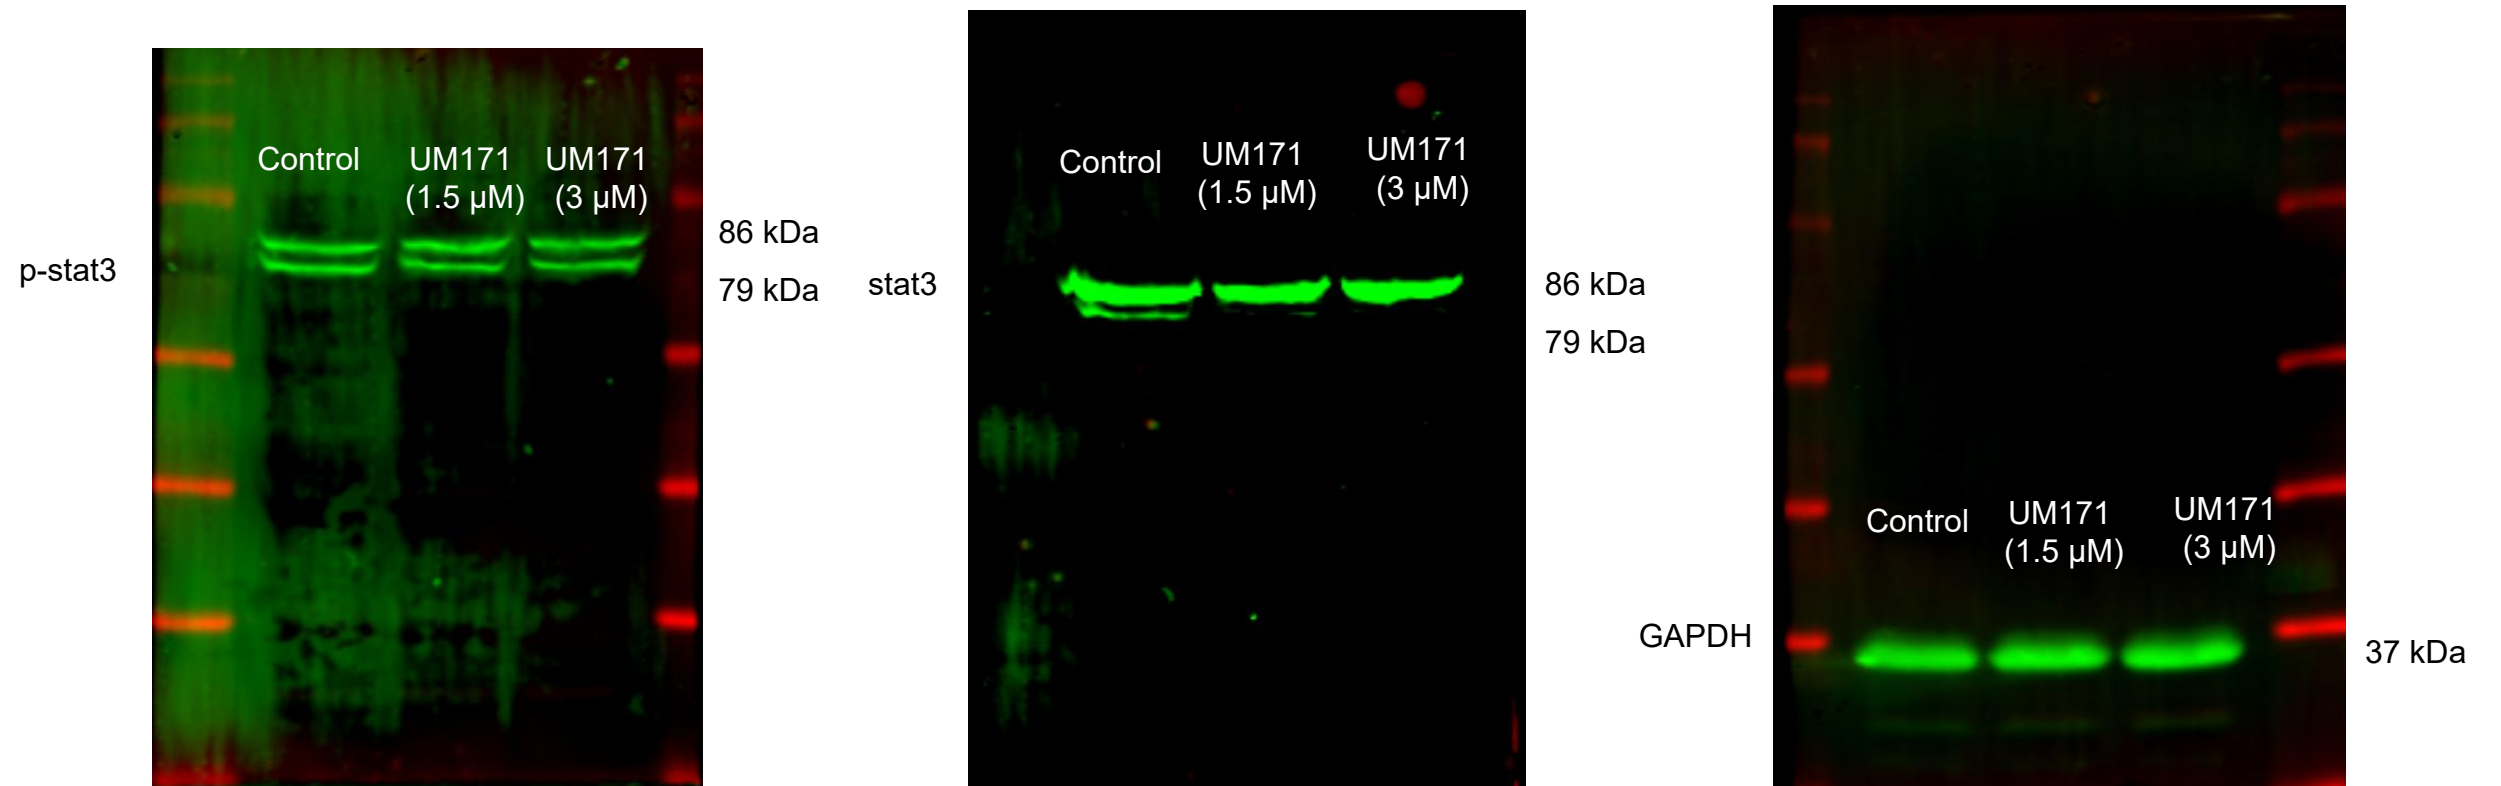



Control    GSK-  
LSD1    UM171    UM171+  
(10  $\mu$ M)    (6  $\mu$ M)    GSK-LSD1

LSD1

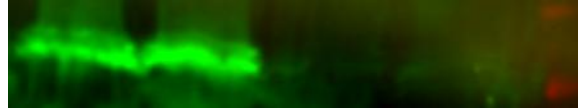

110 KD

GAPDH

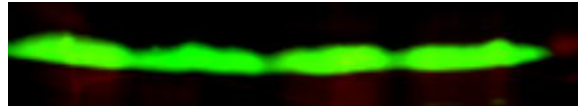

37 KD

Control    GSK-  
LSD1    UM171    UM171+  
(10  $\mu$ M)    (6  $\mu$ M)    GSK-LSD1

LSD1

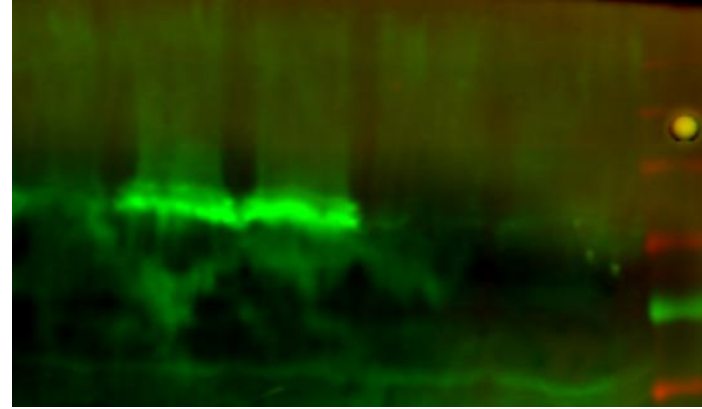

110 KD

GAPDH

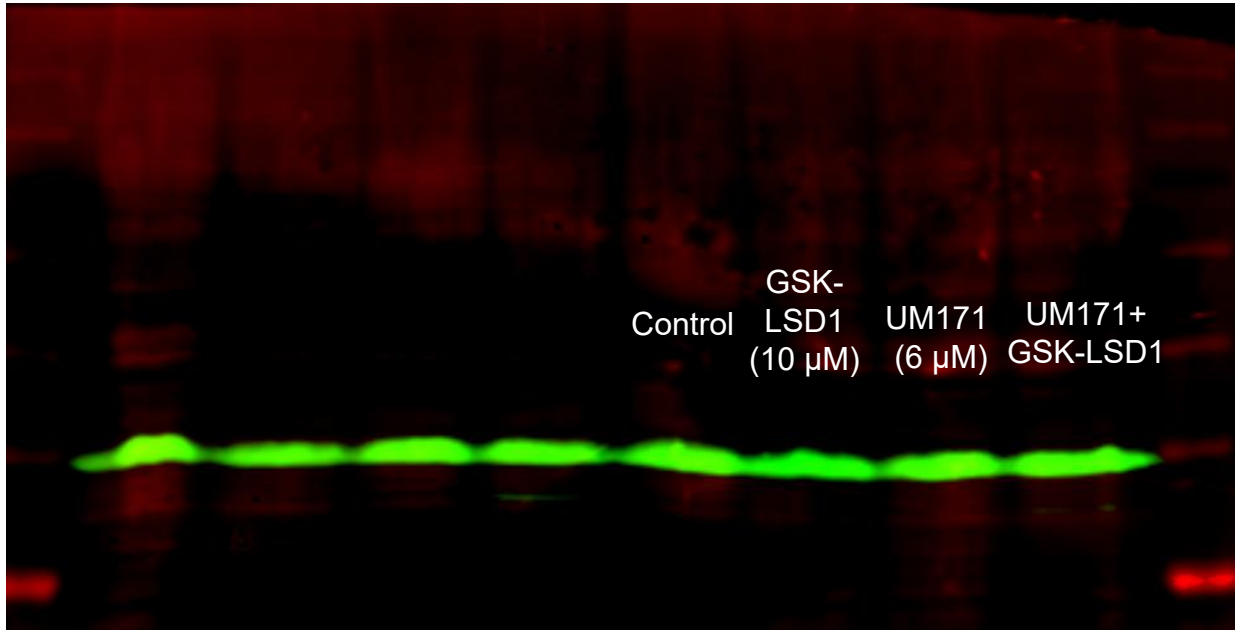

37 KD

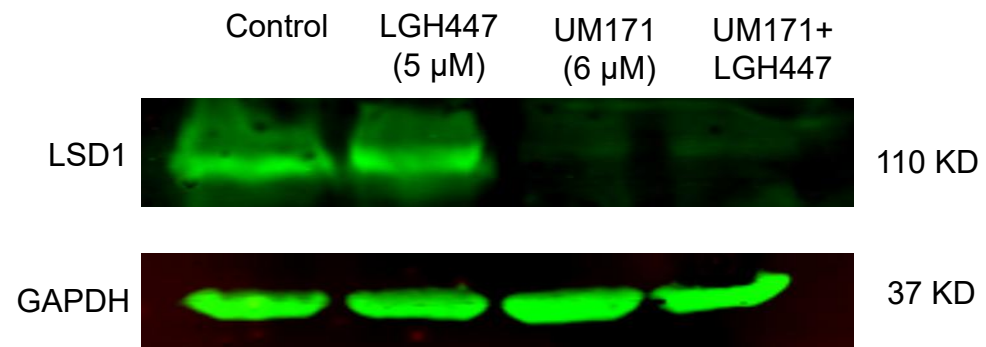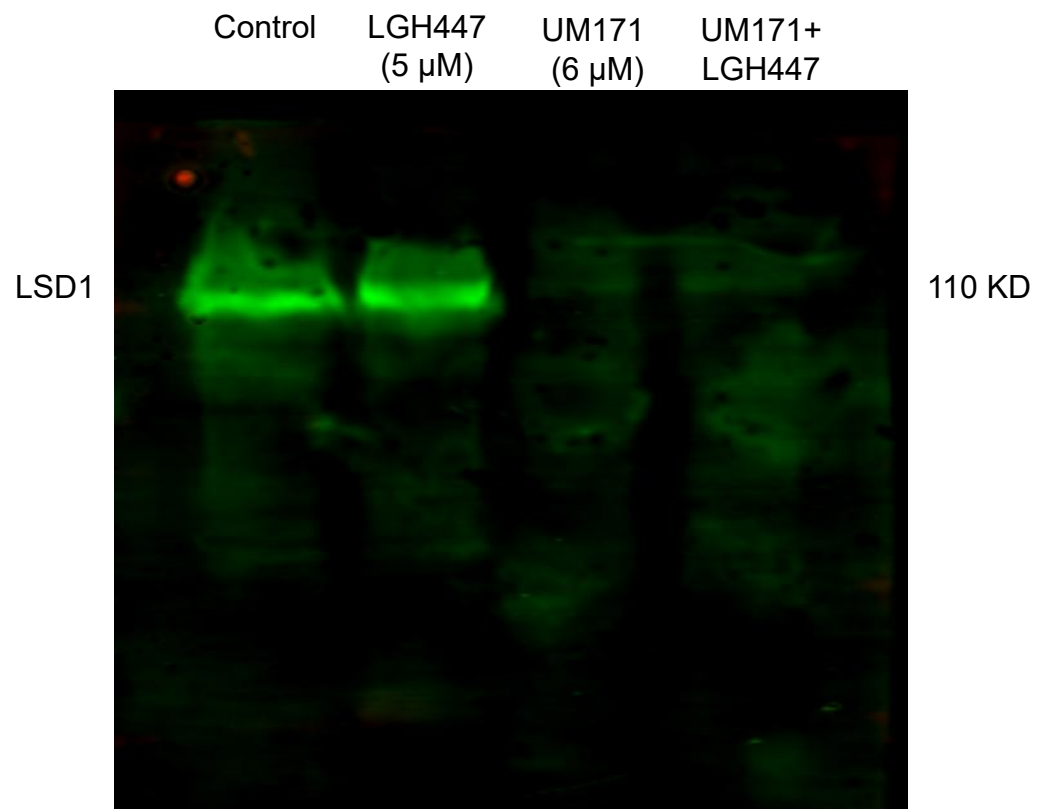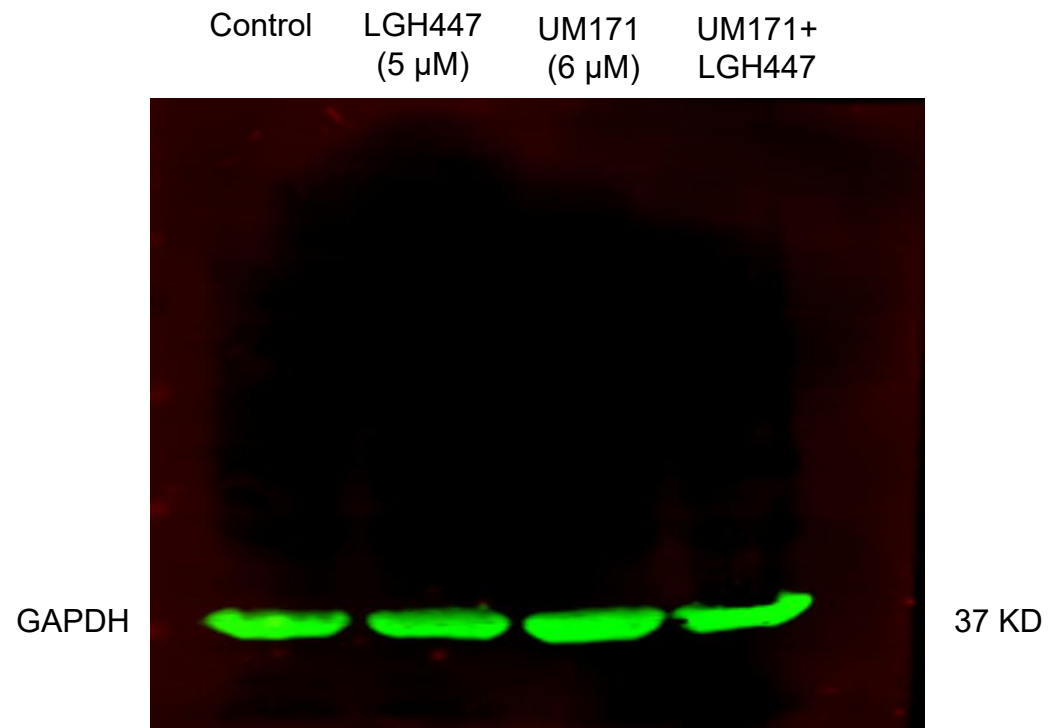

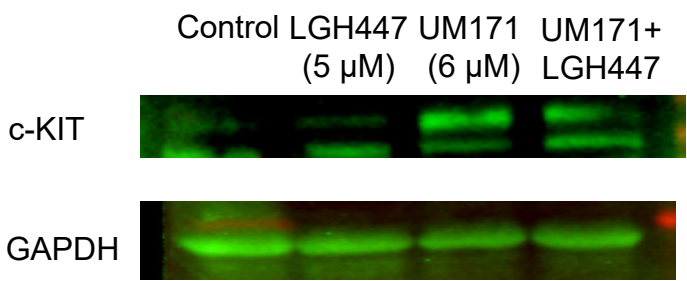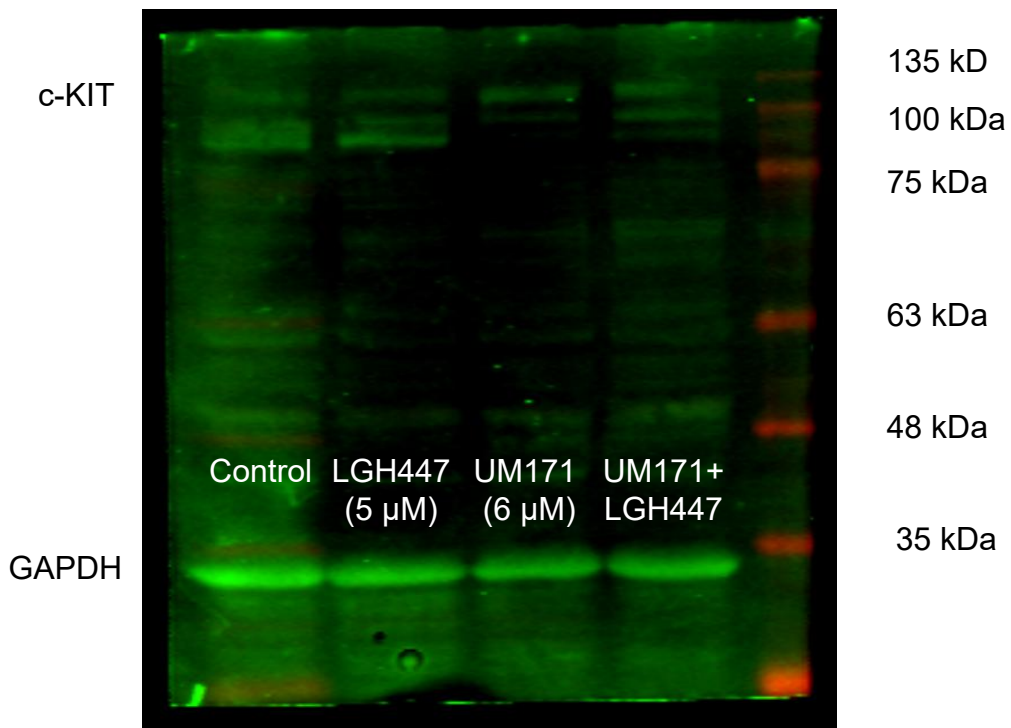

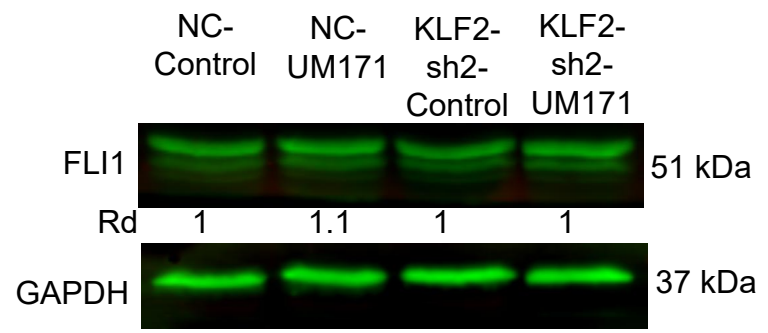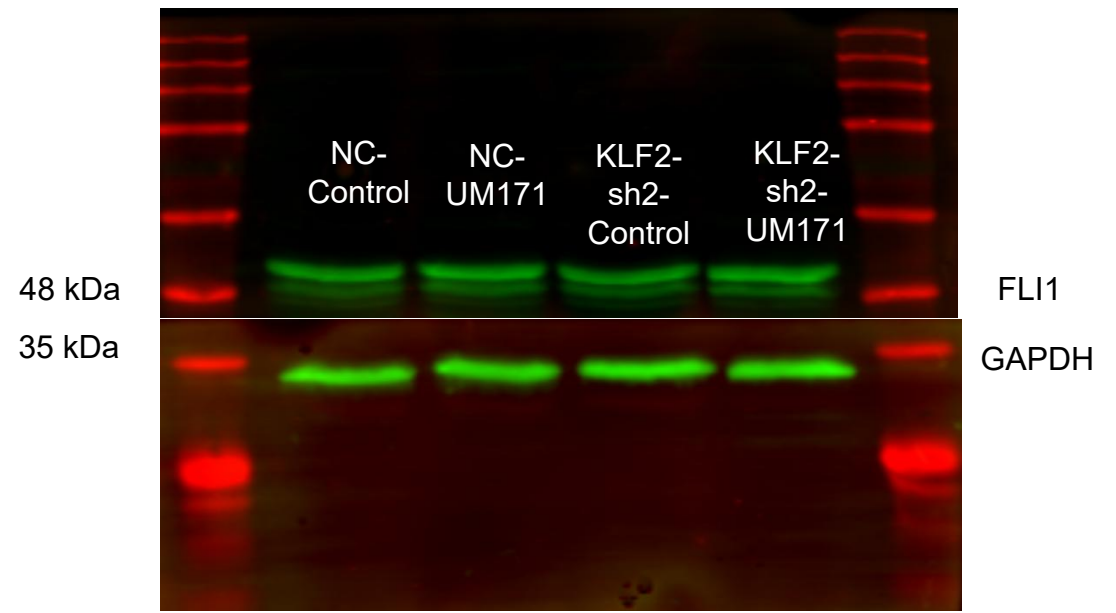

Supplement: 41420_2022_1244_MOESM13_ESM.pdf [file 41420_2022_1244_MOESM13_ESM.pdf]
